# Supplementary material
Source: publisher figshare collection journal article supplement (https://tandf.figshare.com/ndownloader/files/13643261)
Supplement: Supplementary file 1 [file 13643261]

## Sheet: A) richness vs rain, SPEI, time
Supplementary Information Vegetation responses to seasonal weather conditions and decreasing grazing pressure in the arid Succulent Karoo of South Africa Ute Schmiedel and Jens Oldeland African Journal of Range & Forage Science 2018, 35(3&4): 303–310. https://doi.org/10.2989/10220119.2018.1531926
Appendix S1: A) All effects of year and climatic factors on species richness of the four life form types shrub, perennial herb, geophyte and annual. SE = standard error, CI = confidence interval, SON = September-November, DJF = December - February, MAM = March - May, JJA = June-August.
	Life form	Weather	term	slope	std.error	z value	p value	CI low	CI high
	Shrub	Rain_DJF	(Intercept)	11.9655	0.939813	12.7318	6.05e-30	10.116	13.815
	Shrub	Rain_DJF	HabitatUpland	5.46956	1.38419	3.95146	0.000935725	2.56149	8.37763
	Shrub	Rain_DJF	value	0.0419914	0.0967323	0.434099	0.6645	-0.148373	0.232356
	Shrub	Rain_DJF	Year	-0.000393387	0.0362814	-0.0108427	0.991356	-0.0717935	0.0710068
	Shrub	Rain_JJA	(Intercept)	11.9283	0.93329	12.7809	4.03e-30	10.0916	13.7649
	Shrub	Rain_JJA	HabitatUpland	5.47598	1.38647	3.94958	0.000939663	2.56311	8.38885
	Shrub	Rain_JJA	value	0.0798749	0.0750471	1.06433	0.288	-0.0678145	0.227564
	Shrub	Rain_JJA	Year	0.00663639	0.0336182	0.197405	0.843645	-0.0595227	0.0727955
	Shrub	Rain_MAM	(Intercept)	11.814	0.934375	12.6438	1.25e-29	9.97523	13.6529
	Shrub	Rain_MAM	HabitatUpland	5.477	1.38683	3.94929	0.000940274	2.56337	8.39063
	Shrub	Rain_MAM	value	0.153063	0.0895752	1.70877	0.0885	-0.0232171	0.329343
	Shrub	Rain_MAM	Year	0.019412	0.034107	0.569151	0.569682	-0.0477091	0.0865332
	Shrub	Rain_SON	(Intercept)	11.9365	0.934094	12.7787	4.1e-30	10.0983	13.7748
	Shrub	Rain_SON	HabitatUpland	5.47388	1.38572	3.9502	0.000938356	2.56259	8.38518
	Shrub	Rain_SON	value	-0.0971221	0.0778642	-1.24733	0.2133	-0.250355	0.0561112
	Shrub	Rain_SON	Year	0.00432447	0.0340118	0.127146	0.89891	-0.0626093	0.0712582
	Shrub	SPEI_DJF	(Intercept)	11.9285	0.936122	12.7425	5.54e-30	10.0863	13.7708
	Shrub	SPEI_DJF	HabitatUpland	5.47268	1.38529	3.95055	0.000937621	2.56228	8.38308
	Shrub	SPEI_DJF	value	0.00815507	0.0805216	0.101278	0.9194	-0.150308	0.166618
	Shrub	SPEI_DJF	Year	0.00469911	0.0346678	0.135547	0.892271	-0.0635255	0.0729238
	Shrub	SPEI_JJA	(Intercept)	11.9319	0.933982	12.7753	4.22e-30	10.0939	13.77
	Shrub	SPEI_JJA	HabitatUpland	5.47522	1.3862	3.94981	0.000939176	2.56292	8.38751
	Shrub	SPEI_JJA	value	0.0487497	0.085849	0.567854	0.5706	-0.120197	0.217697
	Shrub	SPEI_JJA	Year	0.00554375	0.0338324	0.163859	0.869953	-0.061037	0.0721245
	Shrub	SPEI_MAM	(Intercept)	11.8173	0.929176	12.718	6.78e-30	9.98872	13.6459
	Shrub	SPEI_MAM	HabitatUpland	5.48448	1.38951	3.94706	0.000944952	2.56523	8.40374
	Shrub	SPEI_MAM	value	0.243717	0.084386	2.88813	0.0042	0.0776494	0.409785
	Shrub	SPEI_MAM	Year	0.0232489	0.0319434	0.727815	0.467298	-0.0396143	0.0861121
	Shrub	SPEI_SON	(Intercept)	11.8857	0.936094	12.6971	8.07e-30	10.0435	13.7279
	Shrub	SPEI_SON	HabitatUpland	5.4685	1.38381	3.95177	0.000935088	2.56122	8.37579
	Shrub	SPEI_SON	value	-0.158316	0.0792355	-1.99805	0.0466	-0.314248	-0.00238423
	Shrub	SPEI_SON	Year	0.0090655	0.0349882	0.259102	0.795735	-0.0597897	0.0779207
	Geophyte	Rain_DJF	(Intercept)	1.24974	0.303047	4.1239	5.04e-05	0.652943	1.84653
	Geophyte	Rain_DJF	HabitatUpland	0.911091	0.40154	2.269	0.0358007	0.0674882	1.75469
	Geophyte	Rain_DJF	value	-0.0530207	0.0710664	-0.746073	0.456311	-0.192972	0.0869311
	Geophyte	Rain_DJF	Year	0.0944567	0.0181807	5.19544	0	0.0586533	0.13026
	Geophyte	Rain_JJA	(Intercept)	1.30645	0.293215	4.45561	1.25e-05	0.729021	1.88388
	Geophyte	Rain_JJA	HabitatUpland	0.914801	0.400649	2.2833	0.0347829	0.0730683	1.75653
	Geophyte	Rain_JJA	value	0.0146152	0.0684683	0.21346	0.831139	-0.12022	0.149451
	Geophyte	Rain_JJA	Year	0.0886252	0.0162688	5.44757	0	0.056587	0.120663
	Geophyte	Rain_MAM	(Intercept)	1.32675	0.296879	4.46899	1.18e-05	0.742102	1.91139
	Geophyte	Rain_MAM	HabitatUpland	0.913506	0.401506	2.2752	0.0353558	0.0699739	1.75704
	Geophyte	Rain_MAM	value	-0.0338474	0.0654931	-0.516808	0.605738	-0.162824	0.0951289
	Geophyte	Rain_MAM	Year	0.0859254	0.0170728	5.03289	0	0.0523038	0.119547
	Geophyte	Rain_SON	(Intercept)	1.27571	0.29626	4.30603	2.37e-05	0.692278	1.85914
	Geophyte	Rain_SON	HabitatUpland	0.918312	0.401217	2.28882	0.0343973	0.0753866	1.76124
	Geophyte	Rain_SON	value	0.0636839	0.0646926	0.984409	0.325848	-0.0637159	0.191084
	Geophyte	Rain_SON	Year	0.0907107	0.0167034	5.43067	0	0.0578165	0.123605
	Geophyte	SPEI_DJF	(Intercept)	1.25302	0.297505	4.21175	3.52e-05	0.667138	1.8389
	Geophyte	SPEI_DJF	HabitatUpland	0.919989	0.400108	2.29935	0.0336723	0.0793931	1.76059
	Geophyte	SPEI_DJF	value	-0.0664804	0.063293	-1.05036	0.294547	-0.191124	0.0581632
	Geophyte	SPEI_DJF	Year	0.0937175	0.0171281	5.47155	0	0.0599869	0.127448
	Geophyte	SPEI_JJA	(Intercept)	1.32027	0.294257	4.48678	1.09e-05	0.740783	1.89975
	Geophyte	SPEI_JJA	HabitatUpland	0.913134	0.401037	2.27693	0.0352324	0.0705874	1.75568
	Geophyte	SPEI_JJA	value	0.0421714	0.0703322	0.599603	0.549303	-0.0963346	0.180677
	Geophyte	SPEI_JJA	Year	0.0874711	0.0163368	5.35424	0	0.0552989	0.119643
	Geophyte	SPEI_MAM	(Intercept)	1.29161	0.293522	4.40039	1.59e-05	0.713575	1.86965
	Geophyte	SPEI_MAM	HabitatUpland	0.914987	0.40079	2.28296	0.0348068	0.072958	1.75702
	Geophyte	SPEI_MAM	value	0.0393234	0.0614628	0.639791	0.522883	-0.081716	0.160363
	Geophyte	SPEI_MAM	Year	0.0902673	0.0164048	5.50248	0	0.057961	0.122573
	Geophyte	SPEI_SON	(Intercept)	1.3067	0.293627	4.4502	1.28e-05	0.728456	1.88494
	Geophyte	SPEI_SON	HabitatUpland	0.915514	0.400901	2.28364	0.0347588	0.0732522	1.75778
	Geophyte	SPEI_SON	value	0.00952081	0.0609465	0.156216	0.875987	-0.110502	0.129543
	Geophyte	SPEI_SON	Year	0.0882846	0.0163866	5.38761	0	0.0560143	0.120555
	Perennial herb	Rain_DJF	(Intercept)	1.12246	0.152328	7.36871	6.66e-12	0.821809	1.4231
	Perennial herb	Rain_DJF	HabitatUpland	0.211123	0.199407	1.05875	0.307638	-0.216563	0.638809
	Perennial herb	Rain_DJF	value	0.00262489	0.0292304	0.0898	0.928549	-0.0550669	0.0603167
	Perennial herb	Rain_DJF	Year	0.00191481	0.00669823	0.285868	0.775319	-0.0113054	0.0151351
	Perennial herb	Rain_JJA	(Intercept)	1.12049	0.149522	7.49384	3.25e-12	0.825384	1.4156
	Perennial herb	Rain_JJA	HabitatUpland	0.212521	0.199684	1.06429	0.305212	-0.215759	0.6408
	Perennial herb	Rain_JJA	value	0.0232418	0.0248976	0.933494	0.351859	-0.0258984	0.072382
	Perennial herb	Rain_JJA	Year	0.00184782	0.00590938	0.312692	0.754889	-0.00981549	0.0135111
	Perennial herb	Rain_MAM	(Intercept)	1.09598	0.150983	7.25894	1.24e-11	0.797984	1.39397
	Perennial herb	Rain_MAM	HabitatUpland	0.215215	0.200002	1.07607	0.300093	-0.213746	0.644176
	Perennial herb	Rain_MAM	value	0.030021	0.0264002	1.13715	0.257039	-0.0220849	0.0821268
	Perennial herb	Rain_MAM	Year	0.00420141	0.00612005	0.686498	0.493313	-0.00787769	0.0162805
	Perennial herb	Rain_SON	(Intercept)	1.1171	0.149657	7.46442	3.85e-12	0.821726	1.41248
	Perennial herb	Rain_SON	HabitatUpland	0.211363	0.199434	1.05981	0.307172	-0.21638	0.639106
	Perennial herb	Rain_SON	value	0.00669523	0.0262951	0.254618	0.799318	-0.0452033	0.0585937
	Perennial herb	Rain_SON	Year	0.00249587	0.0059849	0.417029	0.677171	-0.00931647	0.0143082
	Perennial herb	SPEI_DJF	(Intercept)	1.1105	0.150704	7.36877	6.66e-12	0.813059	1.40794
	Perennial herb	SPEI_DJF	HabitatUpland	0.21162	0.199442	1.06106	0.306626	-0.216141	0.639381
	Perennial herb	SPEI_DJF	value	-0.0123944	0.0273583	-0.45304	0.651084	-0.0663912	0.0416024
	Perennial herb	SPEI_DJF	Year	0.00314837	0.00623877	0.504646	0.614446	-0.00916504	0.0154618
	Perennial herb	SPEI_JJA	(Intercept)	1.12382	0.149736	7.50537	3.04e-12	0.828292	1.41936
	Perennial herb	SPEI_JJA	HabitatUpland	0.214197	0.199899	1.07153	0.302056	-0.214542	0.642937
	Perennial herb	SPEI_JJA	value	0.0167639	0.026303	0.637337	0.524743	-0.0351502	0.068678
	Perennial herb	SPEI_JJA	Year	0.00138678	0.00602629	0.230122	0.818268	-0.0105073	0.0132808
	Perennial herb	SPEI_MAM	(Intercept)	1.10128	0.149957	7.34399	7.67e-12	0.805312	1.39725
	Perennial herb	SPEI_MAM	HabitatUpland	0.217499	0.200186	1.08649	0.295617	-0.211857	0.646855
	Perennial herb	SPEI_MAM	value	0.0479509	0.0255972	1.87329	0.062706	-0.00257012	0.098472
	Perennial herb	SPEI_MAM	Year	0.00338351	0.00590156	0.573325	0.567165	-0.00826435	0.0150314
	Perennial herb	SPEI_SON	(Intercept)	1.11934	0.149286	7.49799	3.17e-12	0.824697	1.41398
	Perennial herb	SPEI_SON	HabitatUpland	0.207507	0.199276	1.0413	0.315385	-0.219898	0.634912
	Perennial herb	SPEI_SON	value	-0.0138055	0.0245922	-0.561376	0.575263	-0.0623428	0.0347319
	Perennial herb	SPEI_SON	Year	0.00257136	0.00594829	0.432287	0.666068	-0.00916871	0.0143114
	Annual	Rain_DJF	(Intercept)	7.18503	0.941192	7.63397	3.26e-13	5.33265	9.03741
	Annual	Rain_DJF	HabitatUpland	-0.766896	1.1362	-0.674969	0.508274	-3.15395	1.62016
	Annual	Rain_DJF	value	-1.49801	0.288884	-5.18552	4.03e-07	-2.06657	-0.929454
	Annual	Rain_DJF	Year	0.342345	0.0648442	5.2795	0	0.214724	0.469967
	Annual	Rain_JJA	(Intercept)	8.91064	0.912128	9.76907	1.09e-19	7.11546	10.7058
	Annual	Rain_JJA	HabitatUpland	-0.759035	1.13495	-0.668785	0.512119	-3.14347	1.6254
	Annual	Rain_JJA	value	0.848452	0.245763	3.45231	0.000637987	0.36476	1.33214
	Annual	Rain_JJA	Year	0.157521	0.0605223	2.6027	0.01	0.0384059	0.276636
	Annual	Rain_MAM	(Intercept)	7.98819	0.923929	8.64589	3.6e-16	6.16978	9.80659
	Annual	Rain_MAM	HabitatUpland	-0.75932	1.13441	-0.669355	0.511764	-3.14262	1.62398
	Annual	Rain_MAM	value	1.2826	0.269788	4.75412	3.13e-06	0.751629	1.81358
	Annual	Rain_MAM	Year	0.255743	0.0622501	4.10831	0	0.133227	0.378258
	Annual	Rain_SON	(Intercept)	9.41197	0.929041	10.1308	7.22e-21	7.58351	11.2404
	Annual	Rain_SON	HabitatUpland	-0.770338	1.13303	-0.679894	0.505222	-3.15074	1.61006
	Annual	Rain_SON	value	-1.12895	0.248443	-4.54409	8.09e-06	-1.61791	-0.639982
	Annual	Rain_SON	Year	0.103026	0.0636265	1.61924	0.106476	-0.0221984	0.228251
	Annual	SPEI_DJF	(Intercept)	9.87502	0.984172	10.0338	1.5e-20	7.93805	11.812
	Annual	SPEI_DJF	HabitatUpland	-0.806424	1.12945	-0.714	0.484384	-3.1793	1.56645
	Annual	SPEI_DJF	value	0.919584	0.256993	3.57824	0.000404845	0.413791	1.42538
	Annual	SPEI_DJF	Year	0.0554806	0.0725931	0.764268	0.445325	-0.0873915	0.198353
	Annual	SPEI_JJA	(Intercept)	9.51902	0.860375	11.0638	5.39e-24	7.8257	11.2123
	Annual	SPEI_JJA	HabitatUpland	-0.698826	1.13903	-0.613526	0.547204	-3.09184	1.69419
	Annual	SPEI_JJA	value	2.13118	0.232812	9.15409	9.83e-18	1.67298	2.58938
	Annual	SPEI_JJA	Year	0.0897333	0.0507464	1.76827	0.0780602	-0.0101418	0.189608
	Annual	SPEI_MAM	(Intercept)	8.42877	0.9062	9.30122	3.39e-18	6.64525	10.2123
	Annual	SPEI_MAM	HabitatUpland	-0.725851	1.13287	-0.640717	0.52978	-3.10593	1.65423
	Annual	SPEI_MAM	value	1.68337	0.25063	6.71658	9.71e-11	1.1901	2.17664
	Annual	SPEI_MAM	Year	0.208595	0.0595119	3.50509	0.001	0.0914679	0.325721
	Annual	SPEI_SON	(Intercept)	8.84337	0.939948	9.40836	1.56e-18	6.99344	10.6933
	Annual	SPEI_SON	HabitatUpland	-0.793861	1.13338	-0.700436	0.49261	-3.17501	1.58728
	Annual	SPEI_SON	value	-0.333238	0.26089	-1.27731	0.202506	-0.846701	0.180224
	Annual	SPEI_SON	Year	0.166066	0.0651892	2.54745	0.011	0.0377658	0.294366

## Sheet: B) cover vs rain, SPEI, time
Elextronic Appendix 1. B) All effects of year and climatic factors on cover (%) of the four life form types shrub, perennial herb, geophyte and annual. SE = standard error, CI = confidence interval, SON = September-November, DJF = December - February, MAM = March - May, JJA = June-August.
	Life form	Weather	term	slope	std.error	z value	p value	CI low	CI high
	Shrub	Rain_DJF	(Intercept)	21.9211	2.25967	9.70102	1.62316e-19	17.4742	26.3681
	Shrub	Rain_DJF	HabitatUpland	-1.61066	3.28194	-0.490765	0.629522	-8.50577	5.28444
	Shrub	Rain_DJF	value	-0.11038	0.343422	-0.321412	0.748124	-0.786219	0.565459
	Shrub	Rain_DJF	Year	-0.453397	0.094678	-4.78883	2.64743e-06	-0.639719	-0.267075
	Shrub	Rain_JJA	(Intercept)	22.1309	2.23731	9.89176	3.89315e-20	17.728	26.5339
	Shrub	Rain_JJA	HabitatUpland	-1.60207	3.28102	-0.488283	0.631244	-8.49524	5.2911
	Shrub	Rain_JJA	value	0.572176	0.267118	2.14203	0.0330011	0.0464993	1.09785
	Shrub	Rain_JJA	Year	-0.472614	0.0879868	-5.37142	1.57611e-07	-0.645768	-0.299459
	Shrub	Rain_MAM	(Intercept)	21.4796	2.24769	9.55632	4.75036e-19	17.0563	25.903
	Shrub	Rain_MAM	HabitatUpland	-1.59577	3.28035	-0.486464	0.632508	-8.48754	5.29599
	Shrub	Rain_MAM	value	0.905571	0.310953	2.91224	0.00385957	0.293629	1.51751
	Shrub	Rain_MAM	Year	-0.402885	0.0915032	-4.40297	1.49001e-05	-0.58296	-0.222811
	Shrub	Rain_SON	(Intercept)	22.13	2.23854	9.88592	4.06801e-20	17.7246	26.5353
	Shrub	Rain_SON	HabitatUpland	-1.6067	3.28152	-0.48962	0.630317	-8.50091	5.28752
	Shrub	Rain_SON	value	-0.277227	0.281993	-0.983097	0.326357	-0.832177	0.277724
	Shrub	Rain_SON	Year	-0.475977	0.0882791	-5.39173	1.42206e-07	-0.649707	-0.302248
	Shrub	SPEI_DJF	(Intercept)	22.4109	2.24681	9.97455	2.08614e-20	17.9893	26.8325
	Shrub	SPEI_DJF	HabitatUpland	-1.60193	3.28101	-0.488244	0.631272	-8.49507	5.29121
	Shrub	SPEI_DJF	value	0.512991	0.293351	1.74873	0.0813678	-0.0643112	1.09029
	Shrub	SPEI_DJF	Year	-0.505121	0.090559	-5.57781	5.46752e-08	-0.683337	-0.326904
	Shrub	SPEI_JJA	(Intercept)	22.3851	2.23115	10.033	1.34125e-20	17.9943	26.7759
	Shrub	SPEI_JJA	HabitatUpland	-1.6115	3.28203	-0.491008	0.629353	-8.50679	5.28379
	Shrub	SPEI_JJA	value	1.03759	0.292618	3.54589	0.000454243	0.461731	1.61345
	Shrub	SPEI_JJA	Year	-0.49576	0.0858964	-5.7716	1.96871e-08	-0.664801	-0.32672
	Shrub	SPEI_MAM	(Intercept)	21.6753	2.24323	9.66255	2.16116e-19	17.2607	26.0899
	Shrub	SPEI_MAM	HabitatUpland	-1.56536	3.27719	-0.477654	0.638646	-8.45049	5.31976
	Shrub	SPEI_MAM	value	1.54735	0.280647	5.51351	7.62848e-08	0.995048	2.09965
	Shrub	SPEI_MAM	Year	-0.411462	0.0907733	-4.53285	8.43668e-06	-0.5901	-0.232824
	Shrub	SPEI_SON	(Intercept)	22.1999	2.23368	9.9387	2.73419e-20	17.8041	26.5957
	Shrub	SPEI_SON	HabitatUpland	-1.61261	3.28215	-0.491327	0.629133	-8.50815	5.28294
	Shrub	SPEI_SON	value	0.629409	0.289144	2.1768	0.03028	0.060387	1.19843
	Shrub	SPEI_SON	Year	-0.484083	0.0868661	-5.57275	5.61328e-08	-0.655031	-0.313134
	Geophyte	Rain_DJF	(Intercept)	0.494774	0.166901	2.96448	0.00331904	0.166095	0.823453
	Geophyte	Rain_DJF	HabitatUpland	-0.111146	0.128335	-0.866066	0.397851	-0.380768	0.158475
	Geophyte	Rain_DJF	value	-0.1122	0.0680565	-1.64863	0.100455	-0.246224	0.0218245
	Geophyte	Rain_DJF	Year	-0.0187068	0.0153941	-1.21519	0.225416	-0.0490225	0.0116089
	Geophyte	Rain_JJA	(Intercept)	0.646159	0.147799	4.37188	1.79525e-05	0.355097	0.93722
	Geophyte	Rain_JJA	HabitatUpland	-0.124257	0.126007	-0.986114	0.337148	-0.388987	0.140473
	Geophyte	Rain_JJA	value	0.268099	0.0650607	4.12076	5.10927e-05	0.139975	0.396224
	Geophyte	Rain_JJA	Year	-0.0312689	0.0130459	-2.39684	0.0172575	-0.0569603	-0.00557755
	Geophyte	Rain_MAM	(Intercept)	0.435776	0.147842	2.94758	0.00349948	0.14463	0.726922
	Geophyte	Rain_MAM	HabitatUpland	-0.113967	0.121141	-0.94078	0.359273	-0.368476	0.140541
	Geophyte	Rain_MAM	value	0.276404	0.0602142	4.59035	6.95167e-06	0.157824	0.394985
	Geophyte	Rain_MAM	Year	-0.0111346	0.0133738	-0.832569	0.405867	-0.0374719	0.0152026
	Geophyte	Rain_SON	(Intercept)	0.592218	0.156372	3.78724	0.000190036	0.284273	0.900162
	Geophyte	Rain_SON	HabitatUpland	-0.105243	0.130468	-0.806659	0.430393	-0.379346	0.16886
	Geophyte	Rain_SON	value	0.0371019	0.0635706	0.583632	0.559984	-0.0880884	0.162292
	Geophyte	Rain_SON	Year	-0.0296888	0.0137969	-2.15185	0.0323481	-0.0568591	-0.0025185
	Geophyte	SPEI_DJF	(Intercept)	0.458458	0.152669	3.00295	0.00293956	0.157805	0.759112
	Geophyte	SPEI_DJF	HabitatUpland	-0.105472	0.122098	-0.86383	0.399046	-0.361989	0.151046
	Geophyte	SPEI_DJF	value	-0.197259	0.0628322	-3.13945	0.0018919	-0.320995	-0.0735226
	Geophyte	SPEI_DJF	Year	-0.0153399	0.0137633	-1.11455	0.266093	-0.0424442	0.0117644
	Geophyte	SPEI_JJA	(Intercept)	0.710511	0.151289	4.69639	4.33036e-06	0.412577	1.00845
	Geophyte	SPEI_JJA	HabitatUpland	-0.117812	0.127242	-0.925889	0.366752	-0.385137	0.149513
	Geophyte	SPEI_JJA	value	0.240553	0.064038	3.75641	0.000213627	0.114442	0.366664
	Geophyte	SPEI_JJA	Year	-0.0393393	0.0133399	-2.949	0.00348398	-0.0656096	-0.013069
	Geophyte	SPEI_MAM	(Intercept)	0.559255	0.150782	3.70903	0.000255341	0.262318	0.856191
	Geophyte	SPEI_MAM	HabitatUpland	-0.110313	0.127649	-0.864194	0.398852	-0.378494	0.157867
	Geophyte	SPEI_MAM	value	0.166144	0.0581424	2.85753	0.00462186	0.0516432	0.280644
	Geophyte	SPEI_MAM	Year	-0.0250902	0.0134103	-1.87097	0.0624946	-0.0514991	0.00131879
	Geophyte	SPEI_SON	(Intercept)	0.627309	0.155926	4.02312	7.57321e-05	0.320242	0.934376
	Geophyte	SPEI_SON	HabitatUpland	-0.103027	0.133025	-0.774497	0.448692	-0.382502	0.176447
	Geophyte	SPEI_SON	value	0.0917636	0.0590276	1.55459	0.121285	-0.0244802	0.208007
	Geophyte	SPEI_SON	Year	-0.0336185	0.0138251	-2.4317	0.0157173	-0.0608444	-0.00639261
	Perennial herb	Rain_DJF	(Intercept)	0.420594	0.15638	2.68956	0.00785106	0.111948	0.729241
	Perennial herb	Rain_DJF	HabitatUpland	0.0270028	0.180105	0.149928	0.88296	-0.359284	0.413289
	Perennial herb	Rain_DJF	value	-0.0288239	0.0371159	-0.776591	0.438454	-0.102079	0.0444315
	Perennial herb	Rain_DJF	Year	-0.00720823	0.00943656	-0.763862	0.445984	-0.0258331	0.0114166
	Perennial herb	Rain_JJA	(Intercept)	0.452102	0.152635	2.96199	0.00348398	0.150849	0.753356
	Perennial herb	Rain_JJA	HabitatUpland	0.0316053	0.181265	0.174359	0.864079	-0.357169	0.42038
	Perennial herb	Rain_JJA	value	0.0481151	0.0310429	1.54996	0.122969	-0.013154	0.109384
	Perennial herb	Rain_JJA	Year	-0.011204	0.00856958	-1.30741	0.192798	-0.0281177	0.00570975
	Perennial herb	Rain_MAM	(Intercept)	0.381955	0.154726	2.46858	0.0145308	0.076573	0.687337
	Perennial herb	Rain_MAM	HabitatUpland	0.0398367	0.183127	0.217536	0.830929	-0.352931	0.432605
	Perennial herb	Rain_MAM	value	0.0871465	0.0331158	2.63157	0.00926273	0.021786	0.152507
	Perennial herb	Rain_MAM	Year	-0.00462239	0.00866867	-0.53323	0.594555	-0.0217317	0.0124869
	Perennial herb	Rain_SON	(Intercept)	0.463625	0.153211	3.02605	0.00285378	0.161233	0.766017
	Perennial herb	Rain_SON	HabitatUpland	0.0281277	0.180649	0.155703	0.87849	-0.359327	0.415582
	Perennial herb	Rain_SON	value	-0.0384953	0.0326841	-1.1778	0.240484	-0.103004	0.0260129
	Perennial herb	Rain_SON	Year	-0.0120891	0.00875189	-1.38131	0.168955	-0.0293626	0.00518447
	Perennial herb	SPEI_DJF	(Intercept)	0.462891	0.15433	2.99935	0.00310245	0.158291	0.767491
	Perennial herb	SPEI_DJF	HabitatUpland	0.0269896	0.180108	0.149852	0.883019	-0.359304	0.413283
	Perennial herb	SPEI_DJF	value	0.0166461	0.0335415	0.496285	0.620319	-0.0495544	0.0828466
	Perennial herb	SPEI_DJF	Year	-0.0117574	0.00899513	-1.30709	0.192907	-0.029511	0.00599617
	Perennial herb	SPEI_JJA	(Intercept)	0.469751	0.152575	3.07882	0.0024154	0.168615	0.770887
	Perennial herb	SPEI_JJA	HabitatUpland	0.0456032	0.183012	0.249182	0.806839	-0.346918	0.438124
	Perennial herb	SPEI_JJA	value	0.0934645	0.0331958	2.81555	0.00543138	0.0279462	0.158983
	Perennial herb	SPEI_JJA	Year	-0.0145322	0.00847786	-1.71414	0.0882841	-0.0312649	0.00220046
	Perennial herb	SPEI_MAM	(Intercept)	0.419751	0.153248	2.73904	0.00680367	0.117287	0.722215
	Perennial herb	SPEI_MAM	HabitatUpland	0.0396413	0.182103	0.217686	0.830814	-0.350931	0.430213
	Perennial herb	SPEI_MAM	value	0.0846115	0.0320849	2.63711	0.00911838	0.0212858	0.147937
	Perennial herb	SPEI_MAM	Year	-0.00839481	0.00856187	-0.980488	0.328206	-0.0252933	0.00850367
	Perennial herb	SPEI_SON	(Intercept)	0.451388	0.15231	2.96362	0.00346653	0.150775	0.752001
	Perennial herb	SPEI_SON	HabitatUpland	0.0291931	0.180305	0.16191	0.873691	-0.357522	0.415909
	Perennial herb	SPEI_SON	value	0.0106845	0.0310052	0.344604	0.730808	-0.0505102	0.0718793
	Perennial herb	SPEI_SON	Year	-0.0107206	0.00863134	-1.24206	0.215887	-0.0277562	0.00631499
	Annual	Rain_DJF	(Intercept)	6.92779	1.16561	5.94349	7.93959e-09	4.63373	9.22185
	Annual	Rain_DJF	HabitatUpland	-1.38721	1.39092	-0.997339	0.331819	-4.30942	1.53499
	Annual	Rain_DJF	value	-0.56464	0.326779	-1.7279	0.0850637	-1.20778	0.0784997
	Annual	Rain_DJF	Year	-0.270109	0.0820519	-3.29193	0.00111726	-0.431597	-0.108621
	Annual	Rain_JJA	(Intercept)	7.55193	1.12072	6.73846	8.52707e-11	5.34621	9.75764
	Annual	Rain_JJA	HabitatUpland	-1.37301	1.39184	-0.986469	0.336978	-4.29715	1.55114
	Annual	Rain_JJA	value	0.434913	0.268007	1.62277	0.105718	-0.0925566	0.962383
	Annual	Rain_JJA	Year	-0.338348	0.0745293	-4.5398	8.24115e-06	-0.485031	-0.191665
	Annual	Rain_MAM	(Intercept)	6.9712	1.14313	6.09833	3.39019e-09	4.72138	9.22102
	Annual	Rain_MAM	HabitatUpland	-1.3679	1.39621	-0.979726	0.340207	-4.30122	1.56542
	Annual	Rain_MAM	value	0.918871	0.301698	3.04567	0.00253353	0.325093	1.51265
	Annual	Rain_MAM	Year	-0.275424	0.0777798	-3.54108	0.000463633	-0.428504	-0.122344
	Annual	Rain_SON	(Intercept)	7.60396	1.12272	6.77279	6.94821e-11	5.3943	9.81361
	Annual	Rain_SON	HabitatUpland	-1.38015	1.38999	-0.992922	0.333909	-4.3004	1.54011
	Annual	Rain_SON	value	-0.360869	0.278263	-1.29686	0.195703	-0.908525	0.186788
	Annual	Rain_SON	Year	-0.344246	0.0751271	-4.58218	6.82629e-06	-0.492105	-0.196386
	Annual	SPEI_DJF	(Intercept)	7.8171	1.14767	6.81129	5.51761e-11	5.55835	10.0758
	Annual	SPEI_DJF	HabitatUpland	-1.38963	1.39255	-0.997904	0.331553	-4.31527	1.53601
	Annual	SPEI_DJF	value	0.415308	0.288539	1.43935	0.151123	-0.152572	0.983188
	Annual	SPEI_DJF	Year	-0.36427	0.078909	-4.61633	5.85892e-06	-0.519572	-0.208967
	Annual	SPEI_JJA	(Intercept)	8.04131	1.11676	7.20059	5.10546e-12	5.8434	10.2392
	Annual	SPEI_JJA	HabitatUpland	-1.34033	1.39568	-0.960343	0.349606	-4.27255	1.59189
	Annual	SPEI_JJA	value	1.25509	0.281897	4.45229	1.21067e-05	0.700281	1.8099
	Annual	SPEI_JJA	Year	-0.391061	0.0735026	-5.32037	2.06516e-07	-0.535723	-0.246399
	Annual	SPEI_MAM	(Intercept)	7.36566	1.14376	6.43988	4.90792e-10	5.1146	9.61671
	Annual	SPEI_MAM	HabitatUpland	-1.3546	1.40203	-0.966174	0.34676	-4.30016	1.59095
	Annual	SPEI_MAM	value	0.972525	0.287125	3.38711	0.000803247	0.407428	1.53762
	Annual	SPEI_MAM	Year	-0.314135	0.0775703	-4.04968	6.57729e-05	-0.466802	-0.161467
	Annual	SPEI_SON	(Intercept)	7.55715	1.11376	6.78524	6.44974e-11	5.36513	9.74917
	Annual	SPEI_SON	HabitatUpland	-1.39945	1.38714	-1.00888	0.326404	-4.31373	1.51482
	Annual	SPEI_SON	value	0.5053	0.283852	1.78016	0.0760902	-0.0533544	1.06396
	Annual	SPEI_SON	Year	-0.336691	0.0735761	-4.57609	7.01393e-06	-0.481498	-0.191884

## Sheet: C) rain, SPEI vs time
Elextronic Appendix 1. C) All effects of year on climatic factors. SE = standard error, CI = confidence interval, SON = September-November, OND = October - December, NDJ = November - January, DJF = December-February, JFM = January-March, FMA = February-April, MAM = March-May, AMJ=April-June, MJJ= May-July, JJA = June-August, JAS= July-September, ASO = August-September.
	Weather	term	slope	std.error	z value	p value	CI low	CI high
	Rain_April	(Intercept)	1434.28	936.436	1.53164	0.146428	-561.685	3430.25
	Rain_April	Year	-0.708836	0.466119	-1.52072	0.149128	-1.70234	0.284673
	Rain_ASO	(Intercept)	4228.74	2468.14	1.71334	0.107236	-1031.96	9489.45
	Rain_ASO	Year	-2.08563	1.22854	-1.69766	0.110216	-4.70419	0.53293
	Rain_August	(Intercept)	2450.39	1740.26	1.40806	0.179502	-1258.89	6159.66
	Rain_August	Year	-1.20873	0.86623	-1.39539	0.183215	-3.05505	0.637597
	Rain_December	(Intercept)	-0.385677	262.603	-0.00146867	0.998848	-560.111	559.34
	Rain_December	Year	0.00161031	0.130713	0.0123195	0.990333	-0.276998	0.280218
	Rain_DJF	(Intercept)	-1568.69	702.806	-2.23204	0.0412867	-3066.69	-70.6942
	Rain_DJF	Year	0.78606	0.349828	2.24699	0.0401192	0.0404196	1.5317
	Rain_February	(Intercept)	-365.045	248.281	-1.47029	0.162146	-894.243	164.153
	Rain_February	Year	0.183154	0.123584	1.48202	0.159036	-0.0802587	0.446567
	Rain_FMA	(Intercept)	-270.176	1051.23	-0.257009	0.800664	-2510.82	1970.47
	Rain_FMA	Year	0.144026	0.52326	0.275249	0.786881	-0.971275	1.25933
	Rain_January	(Intercept)	-860.663	551.932	-1.55936	0.139756	-2037.08	315.752
	Rain_January	Year	0.430692	0.274729	1.5677	0.137802	-0.154879	1.01626
	Rain_JJA	(Intercept)	206.49	2340.49	0.0882252	0.930865	-4782.15	5195.13
	Rain_JJA	Year	-0.0699934	1.165	-0.0600802	0.952885	-2.55313	2.41314
	Rain_July	(Intercept)	-29.004	1360	-0.0213265	0.983266	-2927.77	2869.76
	Rain_July	Year	0.0251419	0.67695	0.03714	0.970863	-1.41774	1.46803
	Rain_June	(Intercept)	-2176.55	1401.28	-1.55326	0.141202	-5163.29	810.2
	Rain_June	Year	1.09431	0.697497	1.56891	0.137519	-0.392368	2.58099
	Rain_MAM	(Intercept)	1836.05	2084.26	0.880913	0.392262	-2606.44	6278.54
	Rain_MAM	Year	-0.900241	1.03746	-0.867739	0.399207	-3.11153	1.31105
	Rain_March	(Intercept)	-1350.46	699.643	-1.93022	0.07271	-2841.72	140.791
	Rain_March	Year	0.674996	0.348253	1.93823	0.0716509	-0.0672889	1.41728
	Rain_May	(Intercept)	1556.87	1778.16	0.875553	0.395078	-2233.19	5346.93
	Rain_May	Year	-0.769136	0.885094	-0.868987	0.398546	-2.65567	1.1174
	Rain_MJJ	(Intercept)	378.748	3407.83	0.111141	0.912978	-6884.87	7642.37
	Rain_MJJ	Year	-0.160899	1.69628	-0.0948542	0.925686	-3.77643	3.45463
	Rain_NDJ	(Intercept)	-1662.28	710.09	-2.34095	0.0334617	-3175.8	-148.761
	Rain_NDJ	Year	0.834827	0.353453	2.36191	0.0321249	0.0814587	1.5882
	Rain_November	(Intercept)	-1033.46	430.407	-2.40112	0.0297596	-1950.85	-116.069
	Rain_November	Year	0.518109	0.214239	2.41837	0.0287721	0.0614696	0.974748
	Rain_October	(Intercept)	527.617	1388.34	0.380035	0.709247	-2431.56	3486.79
	Rain_October	Year	-0.258593	0.691057	-0.3742	0.713492	-1.73155	1.21436
	Rain_JFM	(Intercept)	-2631.55	915.445	-2.87461	0.0115753	-4582.77	-680.321
	Rain_JFM	Year	1.31645	0.455671	2.88904	0.0112416	0.345213	2.28769
	Rain_AMJ	(Intercept)	869.411	3845.67	0.226075	0.824195	-7327.45	9066.27
	Rain_AMJ	Year	-0.411774	1.91422	-0.215114	0.832576	-4.49183	3.66828
	Rain_JAS	(Intercept)	2997.42	2087.39	1.43596	0.171539	-1451.75	7446.58
	Rain_JAS	Year	-1.46573	1.03902	-1.41069	0.178739	-3.68034	0.748884
	Rain_OND	(Intercept)	434.046	520.376	0.834101	0.41731	-675.109	1543.2
	Rain_OND	Year	-0.206858	0.259022	-0.798613	0.436978	-0.75895	0.345234
	Rain_September	(Intercept)	630.972	707.594	0.891714	0.386627	-877.23	2139.17
	Rain_September	Year	-0.309566	0.352211	-0.878921	0.393306	-1.06029	0.441154
	Rain_SON	(Intercept)	975.552	924.429	1.0553	0.307989	-994.822	2945.93
	Rain_SON	Year	-0.473289	0.460142	-1.02857	0.319983	-1.45406	0.507481
	SPEI_April	(Intercept)	207.205	108.897	1.90276	0.0764459	-24.9035	439.314
	SPEI_April	Year	-0.103157	0.0542044	-1.90312	0.0763963	-0.218691	0.0123766
	SPEI_August	(Intercept)	143.37	109.943	1.30404	0.211877	-90.9675	377.707
	SPEI_August	Year	-0.071352	0.0547249	-1.30383	0.211947	-0.187995	0.0452914
	SPEI_December	(Intercept)	23.923	116.518	0.205317	0.840085	-224.429	272.275
	SPEI_December	Year	-0.0119033	0.0579977	-0.205238	0.840146	-0.135523	0.111716
	SPEI_February	(Intercept)	-178.406	73.3237	-2.43313	0.0289681	-335.67	-21.1426
	SPEI_February	Year	0.0887875	0.0364884	2.43331	0.0289584	0.0105277	0.167047
	SPEI_January	(Intercept)	-21.6904	137.571	-0.157667	0.87697	-316.75	273.369
	SPEI_January	Year	0.0108042	0.06846	0.157818	0.876854	-0.136028	0.157636
	SPEI_July	(Intercept)	-40.164	102.417	-0.392162	0.700454	-258.461	178.132
	SPEI_July	Year	0.0199976	0.0509789	0.392272	0.700375	-0.0886614	0.128657
	SPEI_July	(Intercept)	-183.248	86.2743	-2.12401	0.0507073	-367.137	0.641479
	SPEI_July	Year	0.0912196	0.0429438	2.12416	0.050693	-0.000312862	0.182752
	SPEI_March	(Intercept)	-94.0407	68.1552	-1.3798	0.187869	-239.31	51.2286
	SPEI_March	Year	0.0467705	0.0339248	1.37865	0.188217	-0.0255385	0.11908
	SPEI_May	(Intercept)	103.261	166.497	0.620198	0.544435	-251.618	458.14
	SPEI_May	Year	-0.0514382	0.082875	-0.620672	0.544132	-0.228082	0.125206
	SPEI_November	(Intercept)	-177.861	95.5958	-1.86055	0.0825265	-381.618	25.8969
	SPEI_November	Year	0.0885318	0.0475836	1.86055	0.0825263	-0.0128904	0.189954
	SPEI_October	(Intercept)	71.8289	147.41	0.487273	0.633109	-242.368	386.026
	SPEI_October	Year	-0.0357285	0.0733745	-0.486933	0.633345	-0.192123	0.120666
	SPEI_September	(Intercept)	38.0526	117.87	0.322835	0.751277	-213.182	289.287
	SPEI_September	Year	-0.0189469	0.0586709	-0.322935	0.751202	-0.144001	0.106107
	SPEI_AMJ	(Intercept)	53.3703	180.43	0.295795	0.771442	-331.207	437.948
	SPEI_AMJ	Year	-0.0266482	0.0898105	-0.296716	0.770752	-0.218075	0.164778
	SPEI_ASO	(Intercept)	164.677	135.134	1.21862	0.241808	-123.354	452.709
	SPEI_ASO	Year	-0.0819757	0.0672642	-1.21871	0.241774	-0.225346	0.0613946
	SPEI_DJF	(Intercept)	-161.248	95.1515	-1.69464	0.112262	-365.327	42.832
	SPEI_DJF	Year	0.0802433	0.0473507	1.69466	0.112259	-0.0213139	0.1818
	SPEI_FMA	(Intercept)	-45.583	76.8941	-0.592802	0.562768	-210.504	119.339
	SPEI_FMA	Year	0.0226839	0.0382652	0.592808	0.562763	-0.0593868	0.104755
	SPEI_JAS	(Intercept)	80.6382	113.473	0.710637	0.488212	-161.224	322.5
	SPEI_JAS	Year	-0.040141	0.0564822	-0.710683	0.488185	-0.16053	0.0802481
	SPEI_JFM	(Intercept)	-174.456	82.6544	-2.11067	0.0532701	-351.732	2.81973
	SPEI_JFM	Year	0.0868008	0.0411317	2.11031	0.0533056	-0.00141796	0.175019
	SPEI_JJA	(Intercept)	3.43074	131.159	0.026157	0.979477	-276.129	282.991
	SPEI_JJA	Year	-0.00170877	0.0652857	-0.0261738	0.979464	-0.140862	0.137445
	SPEI_MAM	(Intercept)	102.721	112.863	0.910134	0.377145	-137.842	343.283
	SPEI_MAM	Year	-0.0511588	0.0561787	-0.910644	0.376885	-0.170901	0.0685833
	SPEI_MJJ	(Intercept)	-24.7367	137.991	-0.179263	0.86013	-318.857	269.383
	SPEI_MJJ	Year	0.0122898	0.068686	0.178927	0.860389	-0.134111	0.158691
	SPEI_NDJ	(Intercept)	-85.3351	146.306	-0.583262	0.568994	-399.131	228.461
	SPEI_NDJ	Year	0.0424764	0.0728072	0.583409	0.568898	-0.11368	0.198632
	SPEI_OND	(Intercept)	-61.9366	95.6058	-0.647833	0.526885	-265.716	141.842
	SPEI_OND	Year	0.0308204	0.0475886	0.647643	0.527005	-0.0706123	0.132253
	SPEI_SON	(Intercept)	-25.1905	97.77	-0.25765	0.800178	-233.582	183.201
	SPEI_SON	Year	0.0125356	0.0486659	0.257586	0.800227	-0.0911932	0.116264
